# Supplementary material for: Reduction of PCE and TCE by magnetite revisited
Source: Royal Society of Chemistry journal article supplement (doi:10.1039/c8em00286j), 2018-01-01
Supplement: c8em00286j1.pdf [file c8em00286j1.pdf]

## Supporting Information

### Reduction of PCE and TCE by Magnetite Revisited

Johnathan D. Culpepper<sup>1</sup>, Michelle M. Scherer<sup>1</sup>, Thomas C. Robinson<sup>1</sup>, Anke Neumann<sup>2</sup>, David Cwiertny<sup>1</sup>, Drew E. Latta<sup>1\*</sup>

<sup>1</sup>Department of Civil and Environmental Engineering, The University of Iowa, Iowa City, IA 52242 USA

<sup>2</sup>School of Engineering, Newcastle University, Newcastle upon Tyne, NE1 7RU, UK

- 12 pages, 5 figures, 5 tables -

#### Table of Contents

|                                                                                       |     |
|---------------------------------------------------------------------------------------|-----|
| Analytical methods for chlorinated ethenes and reduction products                     | S2  |
| Calculation of $k_{\text{field}}$ and $t_{1/2 \text{ field}}$                         | S2  |
| Table S1. PCE/TCE with Magnetite alone                                                | S3  |
| Table S2. PCE/TCE Magnetite + aqueous Fe(II) reactors with products.                  | S4  |
| Table S3. PCE/TCE with Magnetite + aqueous Fe(II) reactors without products.          | S5  |
| Figure S1. Reactor Photograph                                                         | S6  |
| Figure S2. X-Ray Diffraction spectra of a TCE reactor with Magnetite                  | S7  |
| Figure S3. Reproduction of Sivavec Patent Data                                        | S8  |
| Table S4. PCE/TCE with aqueous Fe(II) alone and no products                           | S9  |
| Table S5. PCE/TCE with aqueous Fe(II) alone, with products                            | S10 |
| Figure S4. X-Ray Diffraction spectra of a TCE reactor with Fe (II) alone              | S11 |
| Figure S5. Mossbauer Spectra of white precipitate in a TCE reactor with Fe (II) alone | S12 |
| References.                                                                           | S12 |

### Analytical methods for chlorinated ethenes and reduction products

PCE and TCE were quantified with GC-ECD after a liquid-liquid extraction of 0.25 to 1 mL of sample containing both the aqueous and solid phases added to 2 mL of hexanes. The ECD column was a Supelco Equity-5 (0.25 mm diameter x 30 m length, 0.5  $\mu\text{m}$  film thickness). The carrier gas was nitrogen at a constant total flow velocities of 1.0 mL/min and a 10:1 inlet split ratio. The detector make-up gas was 95% Argon: 5% methane with flow of 30 mL/min. The oven was programmed for an initial hold of 1 min at 45  $^{\circ}\text{C}$ , then 10  $^{\circ}\text{C}/\text{min}$  to 200  $^{\circ}\text{C}$ . The ECD method detection limits are 0.05  $\mu\text{moles}/\text{L}$  PCE and 0.02  $\mu\text{moles}/\text{L}$  TCE for ( $n = 15$ ).

The daughter products ethane, ethylene, acetylene, the dichloroethenes, and vinyl chloride were detected using a GC-FID. The column used was an Agilent GS-GasPro column (0.320 mm diameter x 30 m length). The carrier gas was nitrogen at a constant total flow of 1.4 mL/min and 7.5:1 inlet split ratio. The detector air flow was 450 mL/min, hydrogen flow 40 mL/min, and make-up gas type was nitrogen and a combined flow rate of 35 mL/min. The oven was set for an isothermal run of 4.5 min at 70  $^{\circ}\text{C}$ . The  $\text{C}_2$  gas analysis was done with 100  $\mu\text{L}$  headspace injections into the column. The detection limits for the FID method are 1.35  $\mu\text{moles}/\text{L}$  ethane, 1.36  $\mu\text{moles}/\text{L}$  ethylene and 1.34  $\mu\text{moles}/\text{L}$  acetylene for ( $n = 10$ ). Products with carbon number  $>\text{C}_2$  were not analyzed in this study. We used Henry's law and the specific dimensionless coefficient  $H^{\text{cc}}$  to calculate dissolved  $\text{C}_2$  gases and headspace PCE and TCE.<sup>1</sup> The averaged values for the  $H^{\text{cc}}$  are as follows: PCE = 1.54, TCE = 2.447, Ethane = 0.0471, and Ethylene = 0.146 and Acetylene = 1.016.<sup>1</sup>

### Calculation of $k_{\text{field}}$ and $t_{1/2\text{-field}}$

In order to estimate field rates for PCE and TCE reduction, we have calculated a  $k_{\text{field}}$  value (in  $\text{yr}^{-1}$ ) following a scheme used in Wiedemeier et al.<sup>2</sup> In that study, the authors used magnetic susceptibility data to calculate the amount of magnetite in their field samples. They used a value for the magnetic susceptibility of their field sediments of  $4 \times 10^{-8} \text{ m}^3/\text{kg}$ . They then used this value to derive the amount of magnetite per kg of aquifer material based on the magnetic susceptibility of magnetite ( $1.117 \times 10^{-3} \text{ m}^3/\text{kg}$ ), the density of magnetite ( $5,170 \text{ kg}/\text{m}^3$ ), and the bulk density of an aquifer sediment ( $1,700 \text{ kg}/\text{m}^3$ ). Based on this calculation, estimated magnetite concentrations were  $\sim 0.1 \text{ g magnetite}/\text{kg sediment}$ . The maximum magnetic susceptibility that they report in their paper is  $\sim 1 \times 10^{-6} \text{ m}^3/\text{kg}$ . Based on their magnetic susceptibility data, one could expect masses of magnetite from 0.1 g to 10 g/kg.

Using this value, we calculated the in-aquifer 1<sup>st</sup> order decay constant ( $k_{\text{aquifer}}$ ) based on our rate constant for PCE and TCE degradation:

For example, the average  $k_{\text{SA}}$  for our pH  $\sim 8.0$ , 5 g/L magnetite,  $\sim 10 \text{ mM Fe(II)}$  experiments is:  
 $k_{\text{SA}} = k_{\text{obs}}/\text{SA} = 1.9 \times 10^{-8} \text{ s}^{-1}/(5 \text{ g/L} \cdot 60 \text{ m}^2/\text{g}) \cdot 3.1536 \times 10^7 \text{ s/year} = 2.0 \times 10^{-3} \text{ L m}^{-2} \text{ yr}^{-1}$

Assuming  $\rho_{\text{bulk}} = 1700 \text{ kg}/\text{m}^3$ , effective porosity:  $\eta_e = 0.2$ , that the aquifer magnetite specific surface area is consistent with that used in our study ( $\text{SSA} \sim 60 \text{ m}^2/\text{g}$ ), and 1 g magnetite/kg sediment ( $m_{\text{mag}}$ ):

$$k_{field} = \frac{m_{mag} \cdot \rho_{bulk} \cdot SSA_{mag} \cdot k_{SA}}{\eta_e} \times \frac{1m^3}{1000 L}$$

$$k_{field} = 1 \frac{\text{g magnetite}}{\text{kg sediment}} \times 1,700 \frac{\text{kg sediment}}{\text{m}^3} \times 60 \frac{\text{m}^2}{\text{g}} \times \frac{1}{0.2} \frac{\text{m}^3 \text{ sediment}}{\text{m}^3 \text{ groundwater}} \times 2.0 \times 10^{-3} \frac{\text{L}}{\text{m}^2 \cdot \text{yr}} \times \frac{1m^3}{1000 L} = 1.0 \text{ yr}^{-1}$$

We estimate  $k_{field} = 1.0 \text{ yr}^{-1}$ . Which gives a half-life of  $\ln(2)/1 = 0.69$  year.

**Table S1. PCE/TCE with Magnetite alone**

| [C] <sub>0</sub><br>(μM) <sup>a</sup> | pH  | Mass<br>loading<br>(g/L) | Stoichiometry   |                   |                   | %<br>loss <sup>b</sup> | %<br>Products <sup>b</sup> | % C<br>recovery <sup>b</sup> | Duration<br>(days) <sup>b</sup> |
|---------------------------------------|-----|--------------------------|-----------------|-------------------|-------------------|------------------------|----------------------------|------------------------------|---------------------------------|
|                                       |     |                          | x <sub>ms</sub> | x <sub>d</sub>    | x <sub>XRD</sub>  |                        |                            |                              |                                 |
| <b>PCE</b>                            |     |                          |                 |                   |                   |                        |                            |                              |                                 |
| ~50 <sup>c</sup>                      | 7.5 | 5                        | 0.50            | 0.55 ± 0.02       | 0.53              | 7.0                    | 0                          | 88                           | 139                             |
| ~50 <sup>c</sup>                      | 7.5 | 5                        | 0.50            | 0.55 ± 0.02       | 0.53              | 7.0                    | 0                          | 97                           | 139                             |
| ~50 <sup>c</sup>                      | 7.5 | 5                        | 0.50            | 0.55 ± 0.02       | 0.53              | 6.9                    | 0                          | 101                          | 105                             |
| ~50 <sup>c</sup>                      | 7.5 | 5                        | 0.50            | 0.55 ± 0.02       | 0.53              | 6.87                   | 0                          | 96                           | 105                             |
| ~50 <sup>c</sup>                      | 7.5 | 5                        | 0.50            | 0.55 ± 0.02       | 0.53              | 6.87                   | 0                          | 106                          | 105                             |
| <b>TCE</b>                            |     |                          |                 |                   |                   |                        |                            |                              |                                 |
| 48                                    | 7.0 | 10                       | 0.46            | 0.5 ± 0.02        | n.d. <sup>d</sup> | -10.7                  | 0                          | 111                          | 91                              |
| 52                                    | 7.5 | 5                        | 0.50            | 0.55 ± 0.02       | 0.53              | 9.9                    | 0                          | 93                           | 56                              |
| 45                                    | 7.5 | 20                       | 0.46            | 0.5 ± 0.02        | n.d.              | -6.3                   | 0                          | 106                          | 140                             |
| 49                                    | 8.0 | 10                       | 0.45            | 0.5 ± 0.02        | n.d.              | -7.8                   | 0                          | 111                          | 91                              |
| 56 <sup>e</sup>                       | 8.0 | 5                        | 0.50            | n.d. <sup>d</sup> | 0.52              | -2.3 <sup>e</sup>      | 0                          | 102 <sup>e</sup>             | 142 <sup>e</sup>                |
| <b>PCE Control<sup>e</sup></b>        |     |                          |                 |                   |                   |                        |                            |                              |                                 |
| 55                                    | 7.5 | 0                        | -               | -                 | -                 | 30                     | 0                          | 70                           | 172                             |
| <b>TCE Control<sup>e</sup></b>        |     |                          |                 |                   |                   |                        |                            |                              |                                 |
| 55                                    | 7.5 | 0                        | -               | -                 | -                 | 29                     | 0                          | 71                           | 135                             |

<sup>a</sup> [C]<sub>0</sub> is the initial concentration of the analyte spiked within reactor.

<sup>b</sup> % products, % analyte loss, and % C recovery are evaluated at the final reported time point.

<sup>c</sup> ~50 is the nominal concentration of PCE or TCE added. Calculations in <sup>b</sup> are based on nominal concentrations.

<sup>d</sup> n.d. measurement not determined.

<sup>e</sup> Averages of triplicate reactors.

TABLE S2. PCE/TCE Magnetite + aqueous Fe(II) reactors with products.

| [CE] <sub>0</sub> <sup>a</sup><br>μM | pH  | Solids<br>loading<br>(g/L) | [Fe(II)] <sub>0</sub><br>mM <sup>b</sup> | Saturation<br>Index <sup>c</sup> | [Fe(II)] <sub>f</sub><br>mM <sup>b</sup> | Stoichiometry                      |                                      | %<br>loss <sup>f</sup> | %<br>products <sup>f</sup> | % C<br>recovery <sup>f</sup> | Duration<br>(days) | <i>k</i> <sub>obs</sub><br>s <sup>-1</sup> | <i>k</i> <sub>SA</sub><br>L m <sup>-2</sup> d <sup>-1</sup> | <i>k</i> <sub>field</sub> <sup>h</sup><br>yr <sup>-1</sup> | <i>t</i> <sub>1/2 field</sub><br>years |
|--------------------------------------|-----|----------------------------|------------------------------------------|----------------------------------|------------------------------------------|------------------------------------|--------------------------------------|------------------------|----------------------------|------------------------------|--------------------|--------------------------------------------|-------------------------------------------------------------|------------------------------------------------------------|----------------------------------------|
|                                      |     |                            |                                          |                                  |                                          | <i>x</i> <sub>d</sub> <sup>d</sup> | <i>x</i> <sub>xrd</sub> <sup>e</sup> |                        |                            |                              |                    |                                            |                                                             |                                                            |                                        |
| <b>PCE</b>                           |     |                            |                                          |                                  |                                          |                                    |                                      |                        |                            |                              |                    |                                            |                                                             |                                                            |                                        |
| 53.7                                 | 7.9 | 5                          | 32.9                                     | 0.66                             | 29.7                                     | 0.52 ± 0.03                        | 0.50                                 | 28                     | 6                          | 78                           | 125                | 6.1 × 10 <sup>-9</sup>                     | 1.8 × 10 <sup>-6</sup>                                      | 0.33                                                       | 2.1                                    |
| 54.0                                 | 8.0 | 5                          | 0.93                                     | -0.72                            | n.d. <sup>g</sup>                        | 0.54 ± 0.03                        | 0.51                                 | 18                     | 3                          | 85                           | 140                | 2.9 × 10 <sup>-9</sup>                     | 8.4 × 10 <sup>-7</sup>                                      | 0.16                                                       | 4.5                                    |
| 50.1                                 | 8.5 | 5                          | 32.0                                     | 1.81                             | 3.60                                     | 0.52 ± 0.03                        | 0.50                                 | 40                     | 16                         | 76                           | 125                | 1.7 × 10 <sup>-8</sup>                     | 4.9 × 10 <sup>-6</sup>                                      | 0.91                                                       | 0.76                                   |
| 55.3                                 | 8.6 | 5                          | 7.58                                     | 1.30                             | 1.61                                     | 0.52 ± 0.03                        | 0.50                                 | 41                     | 13                         | 72                           | 125                | 1.3 × 10 <sup>-8</sup>                     | 3.7 × 10 <sup>-6</sup>                                      | 0.70                                                       | 0.99                                   |
| 53.1                                 | 9.0 | 5                          | 0.86                                     | 1.24                             | n.d.                                     | 0.54 ± 0.03                        | 0.51                                 | 32                     | 12                         | 80                           | 140                | 1.0 × 10 <sup>-8</sup>                     | 2.9 × 10 <sup>-6</sup>                                      | 0.54                                                       | 1.3                                    |
| 53.3                                 | 9.3 | 5                          | 7.71                                     | 2.71                             | 0.71                                     | 0.52 ± 0.03                        | 0.50                                 | 32                     | 10                         | 77                           | 125                | 9.6 × 10 <sup>-9</sup>                     | 2.8 × 10 <sup>-6</sup>                                      | 0.52                                                       | 1.3                                    |
| 45.8                                 | 9.4 | 5                          | 31.4                                     | 3.64                             | 3.86                                     | 0.52 ± 0.03                        | 0.50                                 | 41                     | 15                         | 74                           | 125                | 1.6 × 10 <sup>-8</sup>                     | 4.6 × 10 <sup>-6</sup>                                      | 0.86                                                       | 0.81                                   |
| <b>TCE</b>                           |     |                            |                                          |                                  |                                          |                                    |                                      |                        |                            |                              |                    |                                            |                                                             |                                                            |                                        |
| 55.3                                 | 8.0 | 5                          | 0.82                                     | -0.80                            | n.d.                                     | 0.54 ± 0.03                        | 0.51                                 | 28                     | 11                         | 83                           | 139                | 9.6 × 10 <sup>-9</sup>                     | 2.8 × 10 <sup>-6</sup>                                      | 0.97                                                       | 0.72                                   |
| 50.8                                 | 8.0 | 5                          | 8.23                                     | 0.30                             | 4.85                                     | 0.53 ± 0.01                        | 0.48                                 | 24                     | 24                         | 99                           | 167                | 1.8 × 10 <sup>-8</sup>                     | 5.2 × 10 <sup>-6</sup>                                      | 1.3                                                        | 0.52                                   |
| 51.6                                 | 8.0 | 5                          | 8.54                                     | 0.31                             | 4.23                                     | 0.53 ± 0.01                        | 0.48                                 | 27                     | 28                         | 101                          | 167                | 2.1 × 10 <sup>-8</sup>                     | 6.1 × 10 <sup>-6</sup>                                      | 1.1                                                        | 0.62                                   |
| 51.1                                 | 7.9 | 5                          | 9.19                                     | 0.15                             | 4.13                                     | 0.53 ± 0.01                        | 0.48                                 | 26                     | 18                         | 93                           | 167                | 1.4 × 10 <sup>-8</sup>                     | 4.0 × 10 <sup>-6</sup>                                      | 1.2                                                        | 0.59                                   |
| 49.7                                 | 8.0 | 5                          | 9.19                                     | 0.26                             | 5.09                                     | 0.53 ± 0.01                        | 0.48                                 | 14                     | 24                         | 110                          | 167                | 1.8 × 10 <sup>-8</sup>                     | 5.2 × 10 <sup>-6</sup>                                      | 0.80                                                       | 0.86                                   |
| 51.1                                 | 8.0 | 5                          | 9.24                                     | 0.29                             | 4.34                                     | 0.53 ± 0.01                        | 0.48                                 | 31                     | 30                         | 99                           | 167                | 2.5 × 10 <sup>-8</sup>                     | 7.2 × 10 <sup>-6</sup>                                      | 0.86                                                       | 0.81                                   |
| 49.7                                 | 8.0 | 5                          | 9.24                                     | 0.27                             | 5.2                                      | 0.53 ± 0.01                        | 0.48                                 | 29                     | 26                         | 97                           | 167                | 2.1 × 10 <sup>-8</sup>                     | 6.0 × 10 <sup>-6</sup>                                      | 0.75                                                       | 0.92                                   |
| 50.1                                 | 8.0 | 5                          | 9.42                                     | 0.27                             | 5.23                                     | 0.53 ± 0.01                        | 0.48                                 | 28                     | 30                         | 102                          | 167                | 2.2 × 10 <sup>-8</sup>                     | 6.3 × 10 <sup>-6</sup>                                      | 0.86                                                       | 0.81                                   |
| 49.8                                 | 8.0 | 5                          | 9.49                                     | 0.28                             | 5.48                                     | 0.53 ± 0.01                        | 0.48                                 | 25                     | 24                         | 99                           | 167                | 1.5 × 10 <sup>-8</sup>                     | 4.3 × 10 <sup>-6</sup>                                      | 2.8                                                        | 0.25                                   |
| 49.3                                 | 8.0 | 5                          | 9.50                                     | 0.28                             | 5.36                                     | 0.53 ± 0.01                        | 0.48                                 | 22                     | 24                         | 102                          | 167                | 1.6 × 10 <sup>-8</sup>                     | 4.6 × 10 <sup>-6</sup>                                      | 0.97                                                       | 0.72                                   |
| 50.5                                 | 8.0 | 5                          | 9.52                                     | 0.28                             | 4.98                                     | 0.53 ± 0.01                        | 0.48                                 | 25                     | 19                         | 94                           | 167                | 1.4 × 10 <sup>-8</sup>                     | 4.0 × 10 <sup>-6</sup>                                      | 0.070                                                      | 9.9                                    |
| 51.1                                 | 8.0 | 5                          | 9.52                                     | 0.29                             | 4.18                                     | 0.53 ± 0.01                        | 0.48                                 | 24                     | 20                         | 97                           | 167                | 1.6 × 10 <sup>-8</sup>                     | 4.6 × 10 <sup>-6</sup>                                      | 0.31                                                       | 2.3                                    |
| 54                                   | 8.0 | 5                          | 10.0                                     | 0.30                             | n.d.                                     | 0.48 ± 0.03                        | 0.56                                 | 75                     | 46                         | 71                           | 168                | 5.2 × 10 <sup>-8</sup>                     | 1.5 × 10 <sup>-5</sup>                                      | 0.091                                                      | 7.6                                    |
| 51.2                                 | 8.0 | 5                          | 10.69                                    | 0.41                             | 4.57                                     | 0.53 ± 0.01                        | 0.48                                 | 27                     | 26                         | 99                           | 167                | 1.8 × 10 <sup>-8</sup>                     | 5.2 × 10 <sup>-6</sup>                                      | 0.49                                                       | 1.4                                    |
| 61.2                                 | 8.0 | 5                          | 11.2                                     | 0.35                             | n.d.                                     | 0.48 ± 0.03                        | 0.56                                 | 10                     | 5                          | 94                           | 287                | 1.3 × 10 <sup>-9</sup>                     | 3.7 × 10 <sup>-7</sup>                                      | 0.11                                                       | 6.2                                    |
| 49.5                                 | 7.9 | 5                          | 31.2                                     | 0.64                             | 19.56                                    | 0.48 ± 0.03                        | 0.45                                 | -0.8                   | 3                          | 103                          | 69                 | 5.7 × 10 <sup>-9</sup>                     | 1.6 × 10 <sup>-6</sup>                                      | 0.19                                                       | 3.7                                    |
| 69.3                                 | 8.4 | 5                          | 13.1                                     | 1.22                             | n.d.                                     | 0.48 ± 0.03                        | 0.56                                 | 22                     | 5                          | 83                           | 287                | 1.7 × 10 <sup>-9</sup>                     | 4.9 × 10 <sup>-7</sup>                                      | 0.14                                                       | 5.0                                    |
| 53.9                                 | 8.5 | 5                          | 0.67                                     | 0.13                             | n.d.                                     | 0.54 ± 0.03                        | 0.51                                 | 25                     | 11                         | 85                           | 139                | 9.1 × 10 <sup>-9</sup>                     | 2.6 × 10 <sup>-6</sup>                                      | 0.21                                                       | 3.2                                    |
| 51.1                                 | 8.5 | 5                          | 7.55                                     | 1.18                             | 4.18                                     | 0.48 ± 0.03                        | 0.45                                 | 5                      | 2                          | 97                           | 125                | 2.1 × 10 <sup>-9</sup>                     | 6.0 × 10 <sup>-7</sup>                                      | 0.97                                                       | 0.72                                   |
| 51.5                                 | 8.6 | 5                          | 32.9                                     | 1.94                             | 3.50                                     | 0.48 ± 0.03                        | 0.45                                 | 4.5                    | 4                          | 99                           | 125                | 3.5 × 10 <sup>-9</sup>                     | 1.0 × 10 <sup>-6</sup>                                      | 1.3                                                        | 0.52                                   |
| 54.2                                 | 9.0 | 5                          | 7.83                                     | 2.24                             | 0.58                                     | 0.48 ± 0.03                        | 0.45                                 | 13                     | 3                          | 90                           | 125                | 2.6 × 10 <sup>-9</sup>                     | 7.5 × 10 <sup>-7</sup>                                      | 1.1                                                        | 0.62                                   |
| 52.2                                 | 9.1 | 5                          | 30.9                                     | 3.07                             | 1.87                                     | 0.48 ± 0.03                        | 0.45                                 | 11                     | 4                          | 93                           | 125                | 4.0 × 10 <sup>-9</sup>                     | 1.2 × 10 <sup>-6</sup>                                      | 1.2                                                        | 0.59                                   |

<sup>a</sup> [CE]<sub>0</sub> = Initial chloroethylene concentration

<sup>b</sup> [Fe(II)]<sub>0,f</sub> = initial or final Fe(II) concentration, respectively

<sup>c</sup> Saturation index = log(IAP/K<sub>sp</sub>). The ion activity product (IAP) was determined with initial Fe(II) concentration and pH for each experiment. K<sub>sp</sub> = [Fe<sup>2+</sup>] [OH]<sup>2</sup> = 5 × 10<sup>-15</sup>.

<sup>d</sup> *x*<sub>d</sub> = Magnetite Fe(II)/Fe(III) ratio from dissolution

<sup>e</sup> *x*<sub>xrd</sub> = Magnetite Fe(II)/Fe(III) ratio from x-ray diffraction.

<sup>f</sup> % PCE or TCE loss, % Products and % Carbon recovery are taken from the final reported time point.

<sup>g</sup> (n.d.) indicates not determined.

<sup>h</sup> *k*<sub>aquifer</sub> calculated with the assumptions: sediment magnetite content = 1 g/kg, ρ<sub>bulk</sub> = 1700 kg/m<sup>3</sup>, effective porosity: η<sub>e</sub> = 0.2, that the aquifer magnetite specific surface area is 60 m<sup>2</sup>/g.

**TABLE S3. PCE/TCE with Magnetite + aqueous Fe(II) reactors without products.**

| [C] <sub>0</sub> <sup>a</sup><br>(μM) | pH  | Mass<br>loading<br>(g/L) | [Fe(II)] <sub>0</sub> <sup>b</sup><br>(mM) | Saturation<br>Index <sup>c</sup> | Stoichiometry      |                        | %<br>loss <sup>f</sup> | %<br>products <sup>f</sup> | % C<br>recovery <sup>f</sup> | Duration<br>(day) |
|---------------------------------------|-----|--------------------------|--------------------------------------------|----------------------------------|--------------------|------------------------|------------------------|----------------------------|------------------------------|-------------------|
|                                       |     |                          |                                            |                                  | $x_d$ <sup>d</sup> | $x_{xrd}$ <sup>e</sup> |                        |                            |                              |                   |
| <b>PCE</b>                            |     |                          |                                            |                                  |                    |                        |                        |                            |                              |                   |
| 51.7                                  | 7.5 | 5                        | 0.88                                       | -1.7                             | 0.54 ± 0.03        | 0.51                   | 26                     | 0                          | 74                           | 140               |
| ~50                                   | 7.5 | 5                        | 2.7                                        | -1.3                             | 0.55 ± 0.02        | 0.53                   | 10                     | 0                          | 90                           | 78                |
| ~50                                   | 7.5 | 5                        | 4.6                                        | -1.0                             | 0.39 ± 0.03        | 0.54                   | 2.8                    | 0                          | 97                           | 78                |
| 65                                    | 7.5 | 17                       | 10.0                                       | -0.70                            | 0.50 ± 0.06        | n.d. <sup>g</sup>      | -24.5                  | 0                          | 125                          | 91                |
| ~70                                   | 7.5 | 17                       | 25.0                                       | -0.30                            | 0.50 ± 0.06        | n.d.                   | -14.5                  | 0                          | 115                          | 91                |
| 48.9                                  | 8.0 | 5                        | 7.47                                       | 0.21                             | 0.52 ± 0.03        | 0.5                    | 6.4                    | 0                          | 96                           | 125               |
| <b>TCE</b>                            |     |                          |                                            |                                  |                    |                        |                        |                            |                              |                   |
| 22 <sup>h</sup>                       | 6.1 | 147                      | 201 <sup>h</sup>                           | -2.0                             | 0.43               | n.d.                   | 3.8                    | 0                          | 96                           | 104               |
| 51                                    | 7.5 | 20                       | 10.0                                       | -0.70                            | 0.50 ± 0.06        | n.d.                   | 4.0                    | 0                          | 96                           | 128               |
| 50.5                                  | 7.5 | 20                       | 25.0                                       | -0.30                            | 0.50 ± 0.06        | n.d.                   | -2.0                   | 0                          | 102                          | 128               |
| 55.2                                  | 8.1 | 5                        | 8.11                                       | 0.45                             | 0.48 ± 0.03        | 0.45                   | 6                      | 0                          | 94                           | 195               |
| 55.9                                  | 7.5 | 5                        | 0.92                                       | -1.7                             | 0.54 ± 0.03        | 0.51                   | 26                     | 0                          | 74                           | 139               |

\* The magnetite Fe<sub>3</sub>O<sub>4</sub> mineral used in the reactor was freshly precipitated and not freeze dried.

<sup>a</sup> [C]<sub>0</sub> = Initial chloroethylene concentration

<sup>b</sup> [Fe(II)]<sub>0</sub> = initial Fe(II) concentration, respectively

<sup>c</sup> Saturation index = log(IAP/K<sub>sp</sub>). The ion activity product (**IAP**) was determined with initial Fe(II) concentration and pH for each experiment.  $K_{sp} = [Fe^{2+}] [OH^-]^2 = 5 \times 10^{-15}$ .<sup>3</sup>

<sup>d</sup>  $x_d$  = Magnetite Fe(II)/Fe(III) ratio from dissolution

<sup>e</sup>  $x_{xrd}$  = Magnetite Fe(II)/Fe(III) ratio from x-ray diffraction.

<sup>f</sup> % **PCE or TCE loss**, % **Products** and % **Carbon recovery** are taken from the final reported time point.

<sup>g</sup> (**n.d.**) indicates not determined.

<sup>h</sup> 22 g of a mixture of freeze dried magnetite with the stoichiometry determined by a weighted average.

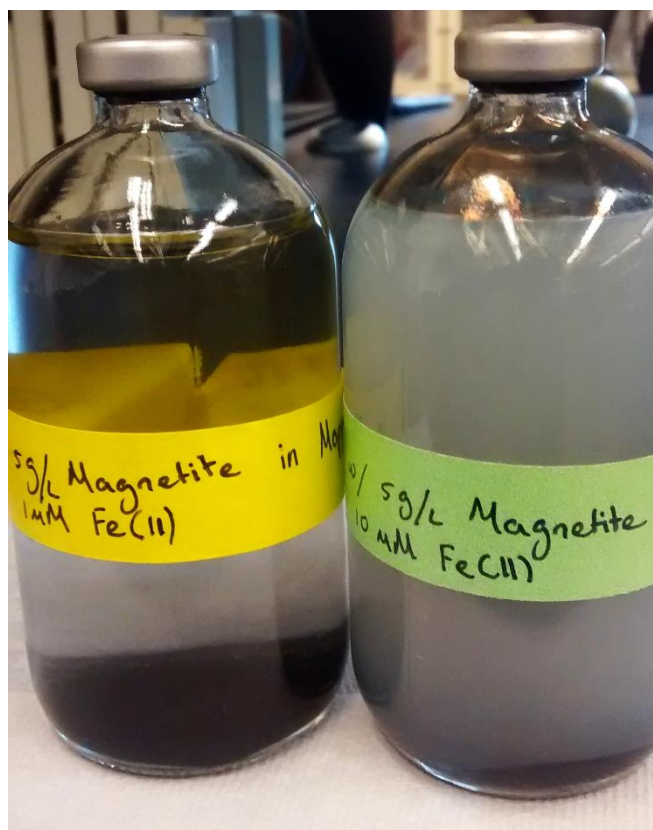

**Figure S1.** Photographs of reactors containing 5 g/L magnetite reacted with low Fe(II) (~1 mM, left) and high Fe(II) (~10 mM, right). The solids on the right contain white  $\text{Fe}(\text{OH})_2(\text{s})$ . Conditions: 10 mM MOPS buffer at pH 8.0, and 50  $\mu\text{M}$  TCE.

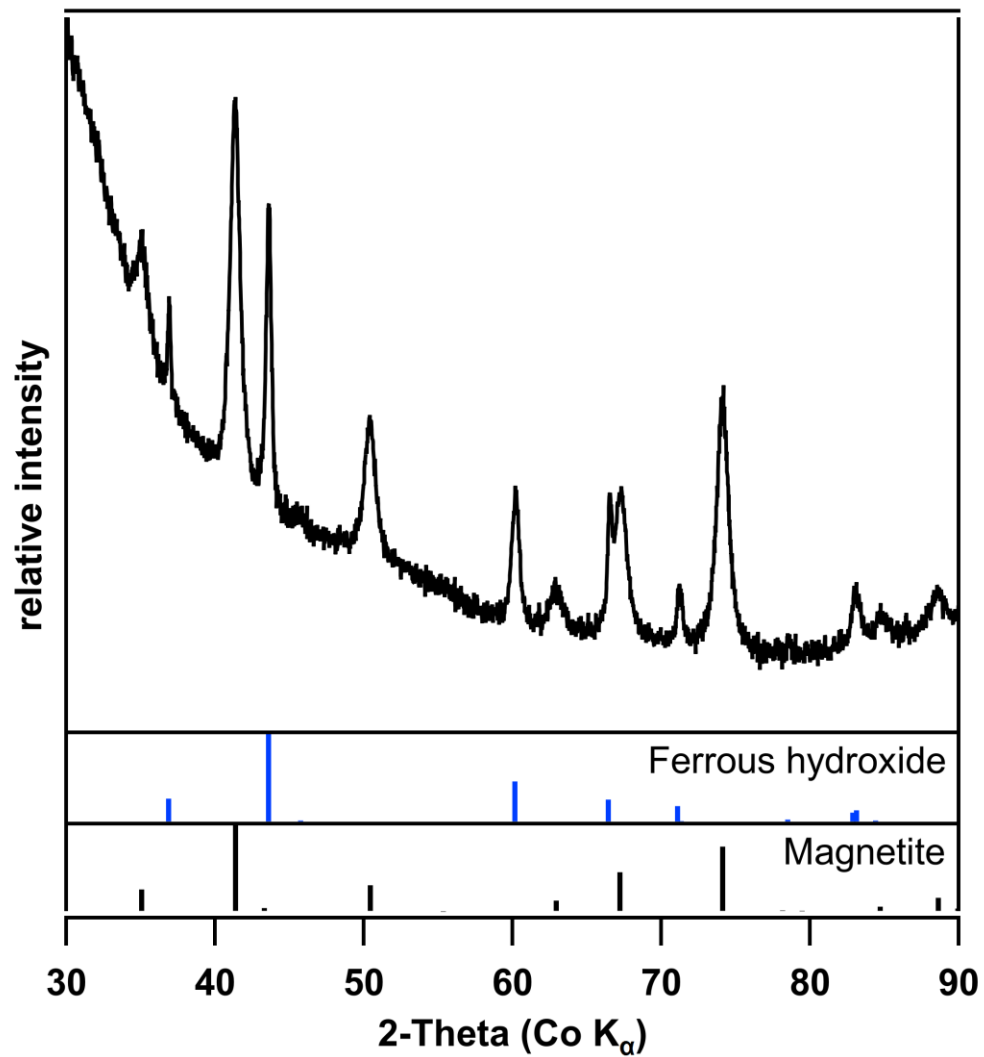

**Figure S2.** X-ray diffraction pattern of a TCE reactor with magnetite and Fe(II) where 30.0% products were observed after 167 days. Blue bars indicate ferrous hydroxide and black bars indicate magnetite. The background at  $2\theta < 60^\circ$  is from the Kapton film used to seal the sample from air. Experimental conditions: 51  $\mu$ M TCE, 10 mM MOPs/NaCl, 9.2 mM Fe(II), pH 8.0.

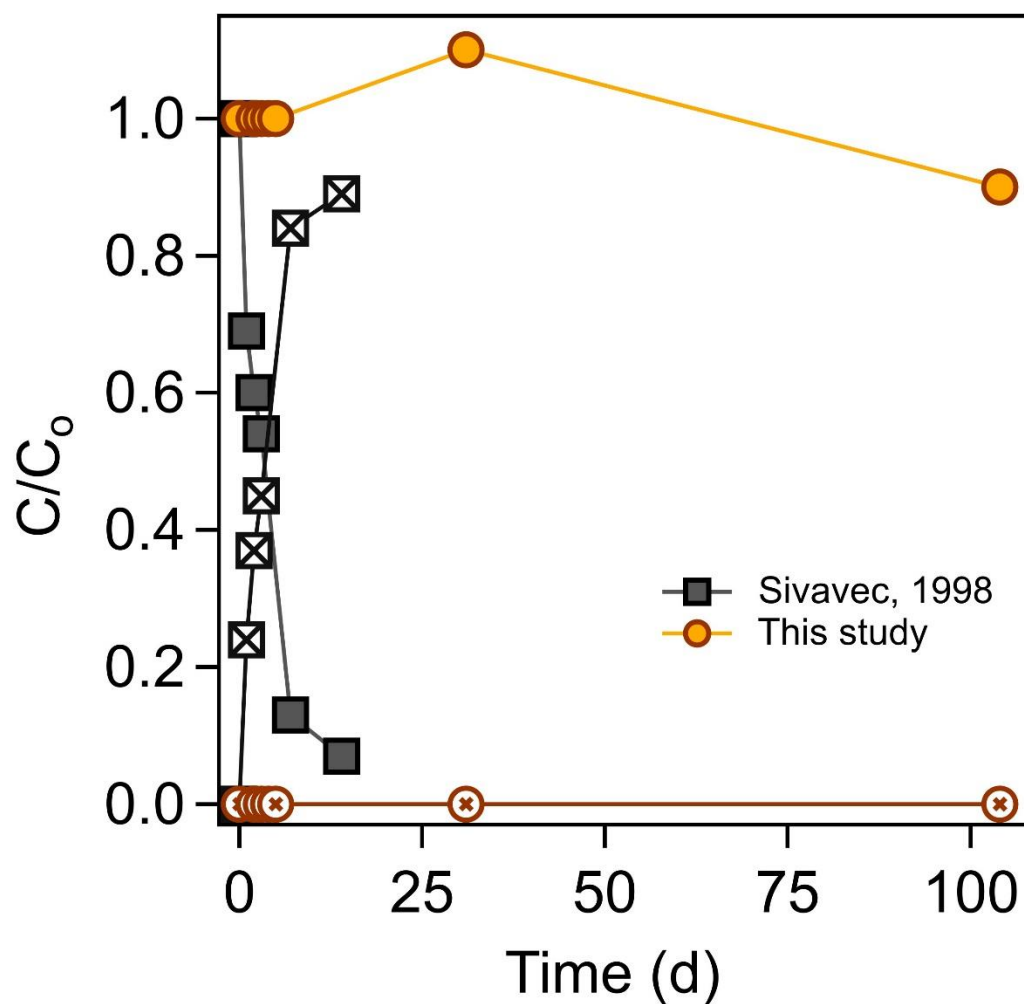

**Figure S3.** TCE reduction (or lack thereof) as reported in the Sivavec patent<sup>4</sup> and our attempt to reproduce the data under similar conditions. **Sivavec:**<sup>4</sup> 7.0  $\mu\text{M}$  TCE, 217 g/L  $\text{Fe}_3\text{O}_4$  (s), 200 mM Fe(II), pH 6.0. **This study:** 22  $\mu\text{M}$  TCE, 147 g/L  $\text{Fe}_3\text{O}_4$  (s),  $201 \pm 12$  mM Fe(II), 10 mM MOPs/NaCl, pH 6.1



**Table S4. PCE/TCE with aqueous Fe(II) alone and no products**

| [C] <sub>0</sub> <sup>a</sup><br>(μM) | pH  | [Fe(II)] <sub>0</sub> <sup>b</sup><br>(mM) | Saturation<br>Index <sup>c</sup> | [Fe(II)] <sub>f</sub> <sup>b</sup><br>(mM) | %<br>loss <sup>d</sup> | %<br>products <sup>d</sup> | % C<br>recovery <sup>d</sup> | Duration<br>(day) |
|---------------------------------------|-----|--------------------------------------------|----------------------------------|--------------------------------------------|------------------------|----------------------------|------------------------------|-------------------|
| <b>PCE</b>                            |     |                                            |                                  |                                            |                        |                            |                              |                   |
| 58.2                                  | 7.0 | 0.3                                        | -3.0                             | 0.16                                       | 20                     | 0                          | 80                           | 138               |
| 55.2                                  | 7.0 | 1.03                                       | -2.7                             | 1.08                                       | 29.6                   | 0                          | 82                           | 134               |
| 53.3                                  | 7.0 | 7.79                                       | -1.8                             | 7.52                                       | 19.1                   | 0                          | 81                           | 117               |
| 50.2                                  | 7.0 | 27.41                                      | -1.3                             | n.d. <sup>e</sup>                          | 16                     | 0                          | 84                           | 140               |
| 56.1                                  | 7.5 | 1.03                                       | -1.6                             | 1.06                                       | 20.4                   | 0                          | 70.4                         | 134               |
| 51.2                                  | 7.5 | 7.52                                       | -0.78                            | 7.17                                       | 17.7                   | 0                          | 82                           | 117               |
| 49.2                                  | 7.5 | 13.52                                      | -0.52                            | n.d.                                       | 13                     | 0                          | 87                           | 140               |
| 50.3                                  | 7.5 | 27.32                                      | -0.28                            | n.d.                                       | 14                     | 0                          | 78                           | 140               |
| 56.3                                  | 7.6 | 0.21                                       | -2.3                             | 0.21                                       | 26.1                   | 0                          | 74                           | 138               |
| 57.2                                  | 8.0 | 1.03                                       | -0.62                            | 1.04                                       | 16.4                   | 0                          | 80                           | 134               |
| 57                                    | 8.1 | 0.2                                        | -1.2                             | 0.18                                       | 21.9                   | 0                          | 78                           | 138               |
| 53.6                                  | 8.5 | 1.01                                       | 0.35                             | 1.02                                       | 16.4                   | 0                          | 84                           | 134               |
| 59.1                                  | 8.6 | 0.23                                       | -0.22                            | 0.2                                        | 8.5                    | 0                          | 92                           | 138               |
| 51.4                                  | 8.6 | 7.67                                       | 1.3                              | 1.56                                       | 15.9                   | 0                          | 84                           | 117               |
| 57                                    | 9.1 | 0.28                                       | 0.93                             | 0.14                                       | 19                     | 0                          | 81                           | 138               |
| 52.7                                  | 9.1 | 1.07                                       | 1.4                              | 0.37                                       | 15.6                   | 0                          | 85                           | 134               |
| 55.7                                  | 9.2 | 7.58                                       | 2.5                              | 1.15                                       | 25.2                   | 0                          | 75                           | 117               |
| <b>TCE</b>                            |     |                                            |                                  |                                            |                        |                            |                              |                   |
| 49.4                                  | 7.0 | 6.71                                       | -1.9                             | 8.08                                       | 1                      | 0                          | 99                           | 117               |
| 54.1                                  | 7.0 | 26.54                                      | -1.3                             | n.d.                                       | 21                     | 0                          | 79                           | 140               |
| 51.9                                  | 7.1 | 0.34                                       | -3.0                             | 0.33                                       | 1                      | 0                          | 99                           | 138               |
| 53.3                                  | 7.1 | 1.06                                       | -2.5                             | 1.02                                       | 4.1                    | 0                          | 96                           | 134               |
| 53.5                                  | 7.5 | 1.04                                       | -1.6                             | 1.08                                       | 4.1                    | 0                          | 96                           | 134               |
| 52.6                                  | 7.5 | 13.13                                      | -0.59                            | n.d.                                       | 14                     | 0                          | 86                           | 140               |
| 56.9                                  | 7.5 | 28.16                                      | -0.25                            | n.d.                                       | 16                     | 0                          | 84                           | 140               |
| 53                                    | 7.6 | 0.23                                       | -2.2                             | 0.2                                        | 2.4                    | 0                          | 98                           | 138               |
| 51.1                                  | 7.6 | 7.59                                       | -0.70                            | 7.64                                       | 1                      | 0                          | 99                           | 117               |
| 51.7                                  | 8.0 | 1.01                                       | -0.71                            | 1.06                                       | 2.2                    | 0                          | 98                           | 134               |
| 66.3                                  | 8.0 | 9.84                                       | 0.29                             | n.d.                                       | 23.5                   | 0                          | 77                           | 75                |
| 152.9                                 | 8.0 | 9.9                                        | 0.30                             | n.d.                                       | -36.6                  | 0                          | 33.2                         | 75                |
| ~50 <sup>f</sup>                      | 8.0 | 10.27                                      | 0.31                             | n.d.                                       | 2.3                    | 0                          | 98                           | 75                |
| ~50 <sup>f</sup>                      | 8.0 | 11.54                                      | 0.36                             | n.d.                                       | 3.1                    | 0                          | 97                           | 75                |
| 79.9                                  | 8.0 | 11.64                                      | 0.37                             | n.d.                                       | 35                     | 0                          | 65                           | 75                |
| ~50 <sup>f</sup>                      | 8.0 | 11.79                                      | 0.37                             | n.d.                                       | 6.3                    | 0                          | 94                           | 75                |
| 52.5                                  | 8.1 | 0.2                                        | -1.2                             | 0.24                                       | 11.1                   | 0                          | 89                           | 138               |
| 53.5                                  | 8.1 | 7.71                                       | 0.21                             | 6.27                                       | 5.5                    | 0                          | 95                           | 117               |
| 53.8                                  | 8.5 | 0.16                                       | -0.43                            | 0.25                                       | 4.5                    | 0                          | 96                           | 138               |
| 52.7                                  | 8.5 | 1.03                                       | 0.35                             | 1                                          | 2.7                    | 0                          | 97                           | 134               |
| 52.8                                  | 8.5 | 7.48                                       | 1.2                              | 1.99                                       | 6.5                    | 0                          | 94                           | 117               |
| 52.1                                  | 9.0 | 0.21                                       | 0.55                             | 0.16                                       | 1.1                    | 0                          | 99                           | 138               |
| 53.9                                  | 9.1 | 1.04                                       | 1.4                              | 0.46                                       | 6.3                    | 0                          | 94                           | 134               |
| 52                                    | 9.1 | 7.23                                       | 2.3                              | 0.88                                       | 2.7                    | 0                          | 97                           | 117               |

<sup>a</sup> [C]<sub>0</sub> = Initial chloroethylene concentration

<sup>b</sup> [Fe(II)]<sub>0,t</sub> = initial or final Fe(II) concentration, respectively

<sup>c</sup> Saturation index = log(IAP/K<sub>sp</sub>). The ion activity product (IAP) was determined with initial Fe(II) concentration and pH for each experiment.  $K_{sp} = [Fe^{2+}][OH^-]^2 = 5 \times 10^{-15.3}$

<sup>d</sup> % PCE or TCE loss, % Products and % Carbon recovery are taken from the final reported time point.

<sup>e</sup> (n.d.) indicates not determined.

<sup>f</sup> First time point determined was not at time zero, and thus the [C]<sub>0</sub> is reported as a nominal concentration.

**Table S5. PCE/TCE with aqueous Fe(II) alone, with products**

| [C] <sub>0</sub> <sup>a</sup><br>(μM) | pH  | [Fe(II)] <sub>0</sub> <sup>b</sup><br>(mM) | Saturation<br>Index <sup>c</sup> | [Fe(II)] <sub>f</sub> <sup>b</sup><br>(mM) | % loss <sup>d</sup> | %<br>products <sup>d</sup> | % C<br>recovery <sup>d</sup> | Duration<br>(day) | <i>k</i> <sub>obs</sub><br>(s <sup>-1</sup> ) |
|---------------------------------------|-----|--------------------------------------------|----------------------------------|--------------------------------------------|---------------------|----------------------------|------------------------------|-------------------|-----------------------------------------------|
| <b>PCE</b>                            |     |                                            |                                  |                                            |                     |                            |                              |                   |                                               |
| 50.2                                  | 8.0 | 31.7                                       | 0.80                             | 1.99                                       | 27.6                | 2.7                        | 75                           | 193               | 1.7 × 10 <sup>-9</sup>                        |
| 54.0                                  | 8.1 | 36.80                                      | 1.1                              | 33.99                                      | 23.3                | 1.1                        | 77                           | 156               | 8.5 × 10 <sup>-10</sup>                       |
| 52.7                                  | 8.5 | ~13.34                                     | 1.4                              | n.d. <sup>e</sup>                          | 14                  | 1.0                        | 86                           | 140               | 1.3 × 10 <sup>-8</sup>                        |
| 54.0                                  | 8.6 | 28.52                                      | 1.9                              | 1.39                                       | 39.0                | 0.3                        | 61                           | 188               | 1.8 × 10 <sup>-10</sup>                       |
| 51.2                                  | 9.0 | ~13.34                                     | 2.4                              | n.d.                                       | 19                  | 1.0                        | 74                           | 140               | 1.8 × 10 <sup>-8</sup>                        |
| 44.4                                  | 9.0 | 28.00                                      | 2.7                              | 0.63                                       | 11.9                | 2.0                        | 90                           | 188               | 4.8 × 10 <sup>-10</sup>                       |
| <b>TCE</b>                            |     |                                            |                                  |                                            |                     |                            |                              |                   |                                               |
| 196.9                                 | 8.0 | 31.62                                      | 0.80                             | 9.39                                       | -21.5               | 3.8                        | 125                          | 193               | 2.3 × 10 <sup>-9</sup>                        |
| 58.9                                  | 8.0 | 31.98                                      | 0.81                             | 15.19                                      | 26.6                | 9                          | 82                           | 193               | 5.6 × 10 <sup>-9</sup>                        |
| 52.6                                  | 8.1 | 35.66                                      | 0.95                             | 33.9                                       | 7                   | 8                          | 100.6                        | 156               | 2.5 × 10 <sup>-9</sup>                        |
| 50.2                                  | 8.5 | 28.26                                      | 1.8                              | 1.73                                       | 5                   | 7.2                        | 102                          | 193               | 4.3 × 10 <sup>-9</sup>                        |
| 50.9                                  | 8.5 | 29.21                                      | 1.8                              | 1.57                                       | -7.9                | 1.2                        | 109                          | 193               | 6.6 × 10 <sup>-10</sup>                       |
| 56.2                                  | 8.5 | ~13.34                                     | 1.4                              | n.d.                                       | 29                  | 6                          | 75                           | 140               | 3.0 × 10 <sup>-9</sup>                        |
| 51                                    | 8.9 | 28.55                                      | 2.6                              | 0.46                                       | 7.4                 | 9                          | 102                          | 193               | 5.7 × 10 <sup>-9</sup>                        |
| 55.6                                  | 9.0 | ~13.34                                     | 2.4                              | n.d.                                       | 24                  | 7                          | 83                           | 140               | 5.7 × 10 <sup>-9</sup>                        |
| 51.5                                  | 9.2 | 28.08                                      | 3.1                              | 0.33                                       | 23.3                | 13                         | 90                           | 193               | 7.7 × 10 <sup>-9</sup>                        |

<sup>a</sup> [C]<sub>0</sub> = Initial chloroethylene concentration

<sup>b</sup> [Fe(II)]<sub>0</sub> = initial Fe(II) concentration

<sup>c</sup> Saturation index = log(IAP/K<sub>sp</sub>). The ion activity product (IAP) was determined with initial Fe(II) concentration and pH for each experiment. K<sub>sp</sub> = [Fe<sup>2+</sup>] [OH<sup>-</sup>]<sup>2</sup> = 5 × 10<sup>-15.3</sup>

<sup>d</sup> % PCE or TCE loss, % Products and % Carbon recovery are taken from the final reported time point. Negative loss numbers indicate higher measured TCE concentrations at the final time point than the initial time point.

<sup>e</sup> n.d. = not determined.

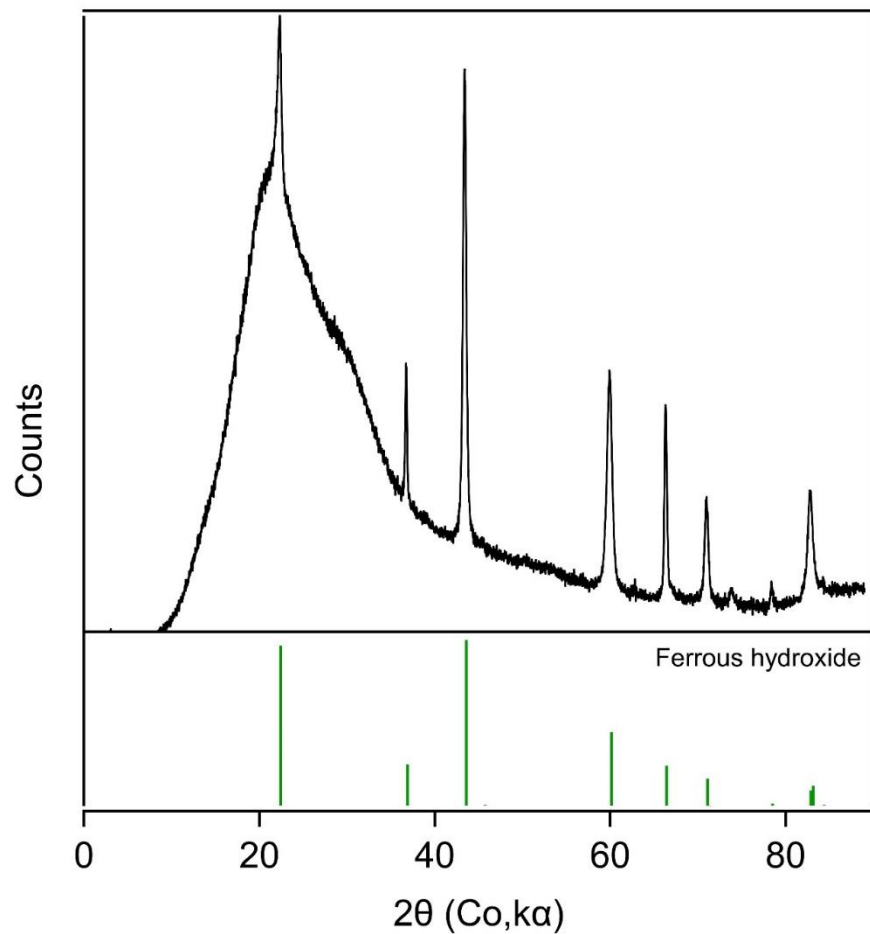

**Figure S4.** X-ray diffraction pattern of a TCE reactor with Fe(II) alone after 193 days where 9.0% products were observed. Light green bars indicate ferrous hydroxide. The background before 60° 2θ is due to Kapton film used to seal the sample from air. Experimental conditions: 60 μM TCE, 10 mM MOPs/NaCl, 32 mM Fe(II), pH 8.0.

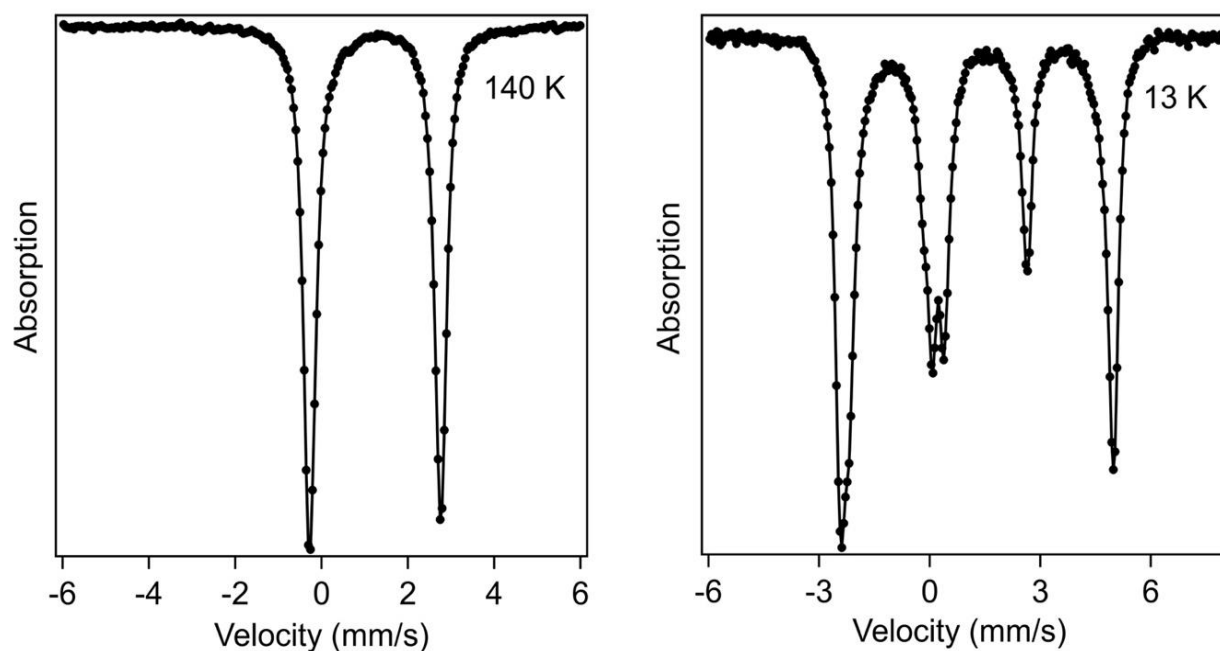

**Figure S5.** Mössbauer spectrum of the white precipitate in Fe(II) alone reactors after reacting with 60  $\mu$ M TCE, 10 mM MOPs/NaCl, pH 8.0 for 193 days where 9.0% products were observed. Note: 32 mM Fe(II) was the initial concentration of dissolved iron added.

## References

1. Sander, R., Compilation of Henry's law constants (version 4.0) for water as solvent. *Atmospheric Chemistry and Physics* **2015**, *15*, (8), 4399-4981.
2. Wiedemeier, T. H.; Wilson, B. H.; Ferrey, M. L.; Wilson, J. T., Efficacy of an In-Well Sonde to Determine Magnetic Susceptibility of Aquifer Sediment. *Groundwater Monitoring & Remediation* **2017**, *37*, (2), 25-34.
3. Sawyer, C. N.; McCarty, P. L.; Parkin, G. F., Chemistry for environmental engineering and science. In 5th ed.; McGraw-Hill: New York, 2003.
4. Sivavec, T. M. Composition and method for ground water remediation. U.S. Patent 5,750,036, May 12, 1998.
